# Supplementary material for: High-Resolution SEM and EDX Characterization of Deposits Formed by CH4+Ar DBD Plasma Processing in a Packed Bed Reactor
Source: MDPI journal article supplement (doi:10.3390/nano9040589), 2019-04-10
Supplement: s1 [file s1]

# High resolution SEM and EDX characterization of deposits formed by CH<sub>4</sub>+Ar DBD plasma processing in a packed bed reactor

Mohammadreza Taheraslani<sup>1,2\*</sup> and Han Gardeniers<sup>1</sup>

1.Mesoscale Chemical Systems, MESA+ Institute for Nanotechnology, University of Twente,  
P.O. Box 217, 7500 AE Enschede, The Netherlands.

2.Faculty of Science and Technology, University of Twente, P.O. Box 217, 7500 AE Enschede,  
The Netherlands.

\*Correspondence: m.taheraslani@utwente.nl

## Supplementary Information

Table S1. The conversion of CH<sub>4</sub> and the selectivity of gas-phase (C<sub>2+</sub>) products and deposits for the non-packed (Blank) and the packed DBD plasma reactor. Total flow rate=50 ml/min, CH<sub>4</sub> concentration=5 %vol CH<sub>4</sub>, Voltage = 7-8 kV, f = 23 kHz, P = 7-8 W.

| Experiment                         | CH <sub>4</sub> Conversion % | C <sub>2+</sub> Selectivity % | Deposits Selectivity % |
|------------------------------------|------------------------------|-------------------------------|------------------------|
| Blank                              | 39.2                         | 49.7                          | 50.3                   |
| γ-alumina                          | 47.7                         | 38.8                          | 61.2                   |
| Pd/γ-alumina                       | 32.8                         | 75.8                          | 24.2                   |
| BaTiO <sub>3</sub>                 | 9.3                          | 76.4                          | 23.6                   |
| MgO/Al <sub>2</sub> O <sub>3</sub> | 35.5                         | 42.1                          | 57.9                   |
| Silica-SBA-15                      | 33.4                         | 49.4                          | 50.6                   |
| α-alumina                          | 46.7                         | 37.8                          | 62.2                   |

$$\text{Conversion of CH}_4 (\%) = \frac{\text{CH}_4 \text{ converted (mmol/s)}}{\text{CH}_4 \text{ introduced (mmol/s)}} \times 100$$

$$\text{Selectivity of C}_{2+} \text{ gas-phase products } (\%) = \frac{\sum \text{C}_x\text{H}_y \text{ produced (mmol/s)} \times x}{\text{CH}_4 \text{ converted (mmol/s)}} \times 100$$

$$\text{Selectivity of the formed deposits } (\%) = \frac{\text{CH}_4 \text{ converted (mmol/s)} - \text{CH}_4 \text{ consumed to form gas-phase products (mmol/s)}}{\text{CH}_4 \text{ converted (mmol/s)}} \times 100$$
